# Supplementary material
Source: publisher site journal article supplement (http://www.degruyter.com/publication/journal_key/BIS/downloadAsset/BIS_CMS_authordate.pdf)
Supplement: Supplementary file 1 [file BIS_CMS_authordate.pdf]

# REFERENCE STYLE CHICAGO MANUAL OF STYLE *author date*

Full guide

## In-text citation

### Direct citation

#### **Single author**

O'Quigley (2000, 9-15)

#### **Two authors**

Greenland and Maldonado (1994)

#### **Three authors**

Robins, Breslow, and Greenland (1986)

#### **More than two/three authors**

Mantel et al. (1977)

#### **Series of references**

[order given in manuscript will not be altered]

#### **Same author group with different years**

Smith et al. (1985, 1986)

#### **Same author group with same year**

Lawrence and David (2009a, 2009b)

#### **Author (with same surname and different initials) with same year**

[order given in manuscript will not be altered]

T. H. E. Smith et al. (2003) and A. Smith et al. (2003)

#### **Single author (multiple articles in different years)**

[order given in manuscript will not be altered]

#### **Single author (multiple articles in one year)**

[order given in manuscript will not be altered]

#### **First releases**

Mansfield ([1922] 1993)

### Indirect citation

#### **Single author**

(O'Quigley 2000, 9-15)

#### **Two authors**

(Greenland and Maldonado 1994)

#### **Three authors**

(Robins, Breslow, and Greenland 1986)

#### **More than two/three authors**

(Mantel et al. 1977)

#### **Series of references**

[order given in manuscript will not be altered]

#### **Same author group with different years**

(Smith et al. 1985, 1986)

#### **Same author group with same years**

(Lawrence and David 2009a, 2009b)

#### **Author (with same surname and different initials) with same year**

[order given in manuscript will not be altered]

#### **Single author (multiple articles in different years)**

(Wald 2019; Wald 2021)

#### **Single author (multiple articles in one year)**

(Wald 2021a; Wald 2021b)

#### **First releases**

(Mansfield [1922] 1993)

## Reference type

### Issue number

Mandatory

### Author initials

Expanded, Initial allowed if given in manuscript

### Reference list label/order

Alphabetical order

DOIs must be provided wherever available. If no DOI is available for a journal or magazine article, the URL and access date must be included, e.g.:

Farkas, Meredith 2017. "Never Neutral: Critical Librarianship and Technology." *American Libraries*.  
<https://americanlibrariesmagazine.org/2017/01/03/never-neutral-critlib-technology/> (accessed January 7, 2021).

For all documents on the web that do not have a DOI a URL and access date must be provided.

Short URLs (e.g., URLs with bit.ly, tinyurl, shortURL etc.) are not acceptable and the full URL must be provided.

### Punctuation b/w journal title and volume

#### Journal

Kamtekar, Rachana. 2016. "The Soul's (After-) Life." *Ancient Philosophy* 36 (6): 115–32.  
<https://doi.org/10.5840/ancientphil20163618>.

#### Journal with supplement/article number

Agha, Asif. 2015. "Tropes of Branding in Forms of Life." In "The Semiotic Corporation," edited by K.-N. Koh and G. Urban. Supplement, *Signs and Society* 3, no. S1: S174–94. <https://doi.org/10.1086/679004>.

### et al. usage

If more than 10 authors only first 7 listed + et al.

Bay, Rachael A., Noah Rose, Rowan Barrett, Louis Bernatchez, Cameron K. Ghalambor, Jesse R. Lasky, Rachel B. Brem et al. 2017. "Predicting Responses to Contemporary Environmental Change Using Evolutionary Response Architectures." *American Naturalist* 189 (5): 463–73.

### Epub ahead of print (DOI)

Tang, Rong, and Kyong Eun Oh. 2022. "The Impact of Types of News on Mobile News Consumption Behavior: A Mixed-Method Research." *Libri*. <https://doi.org/10.1515/libri-2021-0071>.

### Journal – in press/forthcoming

Choi, Sangyup, Davide Furceri, Yifei Huang, and Prakash Loungani. Forthcoming. "Aggregate Uncertainty and Sectoral Productivity Growth: The Role of Credit Constraints." *Journal of International Money and Finance*.

### Book/monograph

Reeve, C. D. C. 1989. *Socrates in the Apology*. Indianapolis: Hackett Publishing.

### Book with edition

Scherer, Frederic, and David Ross. 1990. *Industrial Market Structure and Economic Performance*, 3rd ed. Boston: Houghton Mifflin.

**Edited book**

Parker, Robert Henry, and G. C. Harcourt, eds. 1969. *Readings in the Concept and Measurement of Income*. London: Cambridge University Press.

**Edited book with chapter title (and editors)**

Annas, Julia 2015. "Plato's Defense of Justice: The Wrong Kind of Reason?" In *The Quest for the Good Life: Ancient Philosophers on Happiness*, edited by E. K. Øyvind Rabbås, H.F. Emilsson, and M. Tuominen, 275–94. Oxford: Oxford University Press.

**Book series**

Stole, L. 2007. "Price Discrimination and Competition." In *Handbook of Industrial Organization*, Vol. 3, edited by M. Armstrong, and R. H. Porter, 2221–99. Amsterdam: Elsevier Science Publishers B.V.

Piosik, M., J. Taborek, and M. Woźnicka, eds. 2021. *Korpora in der Lexikographie und Phraseologie*. Lexicographica. Series Major, Vol. 160. Berlin, Boston: De Gruyter. <https://doi.org/10.1515/9783110716955>.

Fuertes-Olivera, P. A., and S. Tarp. 2014. *Theory and Practice of Specialised Online Dictionaries: Lexicography versus Terminography*. Lexicographica. Series Major, Vol. 146. Berlin, Boston: De Gruyter. <https://doi.org/10.1515/9783110349023>.

**Proceedings/Conferences**

Herculano-Houzel, S., C. E. Collins, P. Wong, J. H. Kaas, and R. Lent. 2008. "The Basic Nonuniformity of the Cerebral Cortex." In *Proceedings of the Seventh International Conference on Enterprise Information Systems, Miami, FL*, 97–108. Berlin: Springer-Verlag. <https://doi.org/10.1073/pnas.0805417105>.

Lee, D. J., D. Bates, C. Dromey, X. Xu, and S. Antani. 2003. "An imaging system correlating lip shapes with tongue contact patterns for speech pathology research." In *c2003. CBMS 2003. Proceedings of the 16th IEEE Symposium on Computer-Based Medical Systems; 2003 Jun 26–27; New York*, edited by M. Krol, S. Mitra, and D. J. Lee, 307–13. Los Alamitos: IEEE Computer Society. <https://doi.org/10.1109/CBMS.2003.1212807>.

**Electronic publications with DOI**

Clifford, P. G. 2021. *The China Paradox: At the Front Line of Economic Transformation*. Berlin, Boston: De Gruyter. <https://doi.org/10.1515/9783110724233>.

**Electronic publications without DOI**

Kurland, P. B., and R. Lerner, eds. 1987. *The Founders' Constitution*. Chicago: University of Chicago Press. <http://press-pubs.uchicago.edu/founders/> (accessed March 9, 2022).

[For all documents on the web that do not have a DOI, a URL and access date must be provided.]

**Thesis/Dissertation**

Rahman, M. 2013. "Using Authentic Materials in the Writing Classes: Tertiary Level Scenario." PhD diss., BRAC University. <http://dspace.bracu.ac.bd/xmlui/handle/10361/3112> (accessed December 15, 2021).

**Report**

U.S. Federal Energy Regulatory Commission. 2020. *Annual Report of the U.S. Federal Energy Regulatory Commission*. Washington, D.C.: GPO. <https://www.ferc.gov/sites/default/files/2021-02/2020-Annual-Report-of-FOIA.pdf> (accessed December 15, 2021).

**Patent**

Iizuka, M., and H. Tanaka. Cement admixture. US Patent 4,586,960, filed June 26, 1984, and issued May 6, 1986. <https://patft.uspto.gov/netacgi/nph-Parser?Sect1=PTO1&Sect2=HITOFF&p=1&u=/netahtml/PTO/srchnum.html&r=1&f=G&l=50&d=PALL&s1=4586960.PN> (accessed December 15, 2021).

## Standards

National Information Standards Organization. *Bibliographic References*. ANSI/NISO Z39.29-2005. Bethesda, MD: NISO, approved June 9, 2005; reaffirmed May 13, 2010. <http://www.niso.org/publications/ansiniso-z3929-2005-r2010> (accessed December 15, 2021).

## Multiple articles by the same author in one year

[alphabetized by title]

Wald, C. 2021a. "The Spectral Returns of *The Merchant of Venice* in Marina Carr's *Portia Coughlan*: 'Only his shadow?'" *Shakespeare Bulletin* 39 (2): 241–60. <https://doi.org/10.1353/shb.2021.0023>.

Wald, C. 2021b. "Why Didn't You Just Stay Where You Were, a Relic in the Memory of Poets?": Yoruban Ritual and Sororal Commonality in Femi Ọsófisan's *Tẹ̀gònni: An African Antigone*." *The Journal of Commonwealth Literature* 56 (2): 201–17. <https://doi.org/10.1177/0021989418773142>.

## Multiple articles by the same author in different years

[chronologically from old to new]

Wald, C. 2012. "Medieval Shakespeare?": Introduction." *Shakespeare* 8 (4): 351–5. <https://doi.org/10.1080/17450918.2012.731703>.

Wald, C. 2021. "The Spectral Returns of *The Merchant of Venice* in Marina Carr's *Portia Coughlan*: 'Only his shadow?'" *Shakespeare Bulletin* 39 (2): 241–60. <https://doi.org/10.1353/shb.2021.0023>.

## Websites

Evstatieva, M. 2020. "Anatomy of a COVID-19 Conspiracy Theory." *NPR All Things Considered*. <https://www.npr.org/2020/07/10/889037310/anatomy-of-a-covid-19-conspiracy-theory> (accessed January 7, 2021).

Williams, L. 2014. "Library Programming: Don't Just Follow the Crowd." *Illinois Library Association Reporter* 32: 18–20. [https://www.ila.org/content/documents/Reporter\\_1014.pdf](https://www.ila.org/content/documents/Reporter_1014.pdf) (accessed May 10, 2019).

## Web documents

American Library Association. 2014. *National Impact of Library Public Programs Assessment: White Paper*. American Library Association. [https://nilppa.org/wp-content/uploads/2014/NILPPA\\_White\\_Paper\\_FINAL\\_web.pdf](https://nilppa.org/wp-content/uploads/2014/NILPPA_White_Paper_FINAL_web.pdf) (accessed July 1, 2019).

## Database

Milberger, S. 2002. *Evaluation of Violence Against Women With Physical Disabilities in Michigan, 2000–2001*. ICPSR version. Detroit: Wayne State University. Distributed by Ann Arbor, MI: Inter-University Consortium for Political and Social Research. <https://doi.org/10.3886/ICPSR03414>.

## Cited film works

Weir, P., dir. *Picnic at Hanging Rock*. 1975. London: Picnic Productions, 2008. DVD.

Weir, P., dir. *The Truman Show*. 1998. Los Angeles: Paramount Pictures. 1 hr., 43 min. <https://www.netflix.com/watch/11819086> (accessed June 3, 2020).

## Social Media Sites

Chicago Manual of Style. 2015. "Is the world ready for singular they? We thought so back in 1993." Facebook, April 17, 2015. <https://www.facebook.com/ChicagoManual/posts/10152906193679151> (accessed January 21, 2022).

Souza, P. (@petesouza). 2016. "President Obama bids farewell to President Xi of China at the conclusion of the Nuclear Security Summit." Instagram photo, April 1, 2016. <https://www.instagram.com/p/BDrmfXTtNCt> (accessed January 21, 2022).

**Translations**

Kant, I. [1781] 1929. *Critique of Pure Reason*. Translated by N. Kemp Smith. London: Macmillan & Co., Ltd.

**Special Issues**

Tomii, R., and M. Yoshimoto, eds. 2013. "Collectivism in Twentieth-Century Japanese Art." Special issue, *Positions: Asia Critique* 21, no. 2. <https://doi.org/10.1215/10679847-2018256>.

**Translated titles**

Takeuchi, Y. 武内義雄. 1939. *Jukyō no seishin* 儒教の精神 [The Spirit of Confucianism]. Tōkyō: Iwanami shoten 岩波書店.

**Corporate publication**

IFLA. 2021. *IFLA Annual Report 2020*. The Hague: International Federation of Library Associations and Institutions (IFLA). <https://repository.ifla.org/handle/123456789/1095> (accessed April 26, 2021).
